# Supplementary material
Source: Springer Nature journal article supplement (https://www.springermedizin.de/resource/supplementary/12939_2011_216_MOESM1_ESM.pdf/9550628)

Dominant Discourses

Counter Discourses

Positive Space: LGBT inclusiveness

*Multicultural*

*Diversity*

*SDOH*

*Anti-Oppressive*

*Citizen/Social Rights*

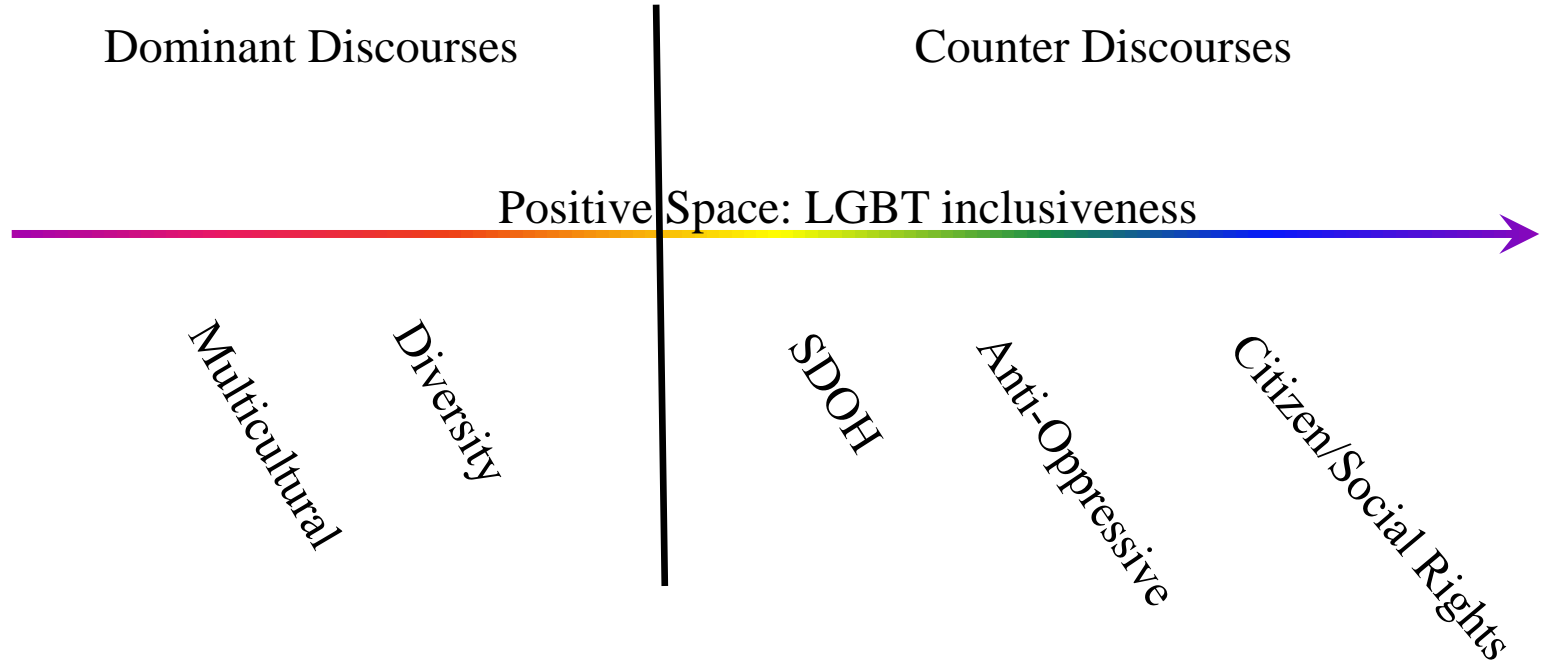

Supplement: MOESM1 [file 9550628]
